# Supplementary material for: Knockdown of THOC1 reduces the proliferation of hepatocellular carcinoma and increases the sensitivity to cisplatin
Source: PubMed Central journal article supplement (PMC7362638; doi:10.1186/s13046-020-01634-7), 2020-07-15
Supplement: 13046_2020_1634_MOESM2_ESM.pdf [file 13046_2020_1634_MOESM2_ESM.pdf]

Supplemental Table 1: Primers used for RT-PCR

| Gene  | Oligonucleotide sequence (5'-3') |
|-------|----------------------------------|
| THOC1 | Forward: TCTTCTGTGGACGGATTCAGC   |
|       | Reverse: CTCGTCTCCCATTTCGCCTTC   |
| GAPDH | Forward: GGAGCGAGATCCCTCCAAAAT   |
|       | Reverse: GGCTGTTGTCATACTTCTCATGG |
