# Supplementary material for: Knockdown of THOC1 reduces the proliferation of hepatocellular carcinoma and increases the sensitivity to cisplatin
Source: Springer Nature journal article supplement (doi:10.1186/s13046-020-01634-7), 2020-07-15
Supplement: MOESM3 [file 18186302]

# Report of Human Cell Line Authentication

(Notice: This authentication report is restricted to the cell sold from Guangzhou Cellcook Biotech Co., Ltd, and the date with seal is the date of delivery. )

## I . Sample

Sample Name: labeled as 'Hep3B'

## II . Method and Procedure

1. PCR is amplified with STR Multi-amplification Kit (PowerPlex™16HS System);
2. PCR products are assayed with 3100 DNA Analyzer (Applied Biosystems®).
3. Amplification of gene COX1 and electrophoresis are employed to survey the species of the sample.

## III. Results

1. The STR profiles of the cell line sample are in the attached table and figure.
2. The search result in ATCC and DSMZ databases.
3. The electrophoresis figure of gene COX1.

Hep3B: ①No loci has tri-alleles or tetra-alleles. Contamination of other human cell line is not found (Figure 1 & Table 1). ②100% matched cell lines are found in ATCC and DSMZ data banks. And the cell line named as "Hep-3B" *et al.* (Figure 2 & Figure 3). ③The sample is a human cell line. Contamination of other species cells are not found in the sample (Figure 4).

Operator: Xiaohua Mo

Auditor: Xuanyi Liang

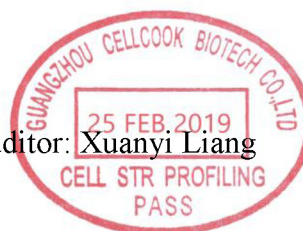

Guangzhou Cellcook Biotech Co., Ltd

Figure 1. STR profiles of Hep3B cell line

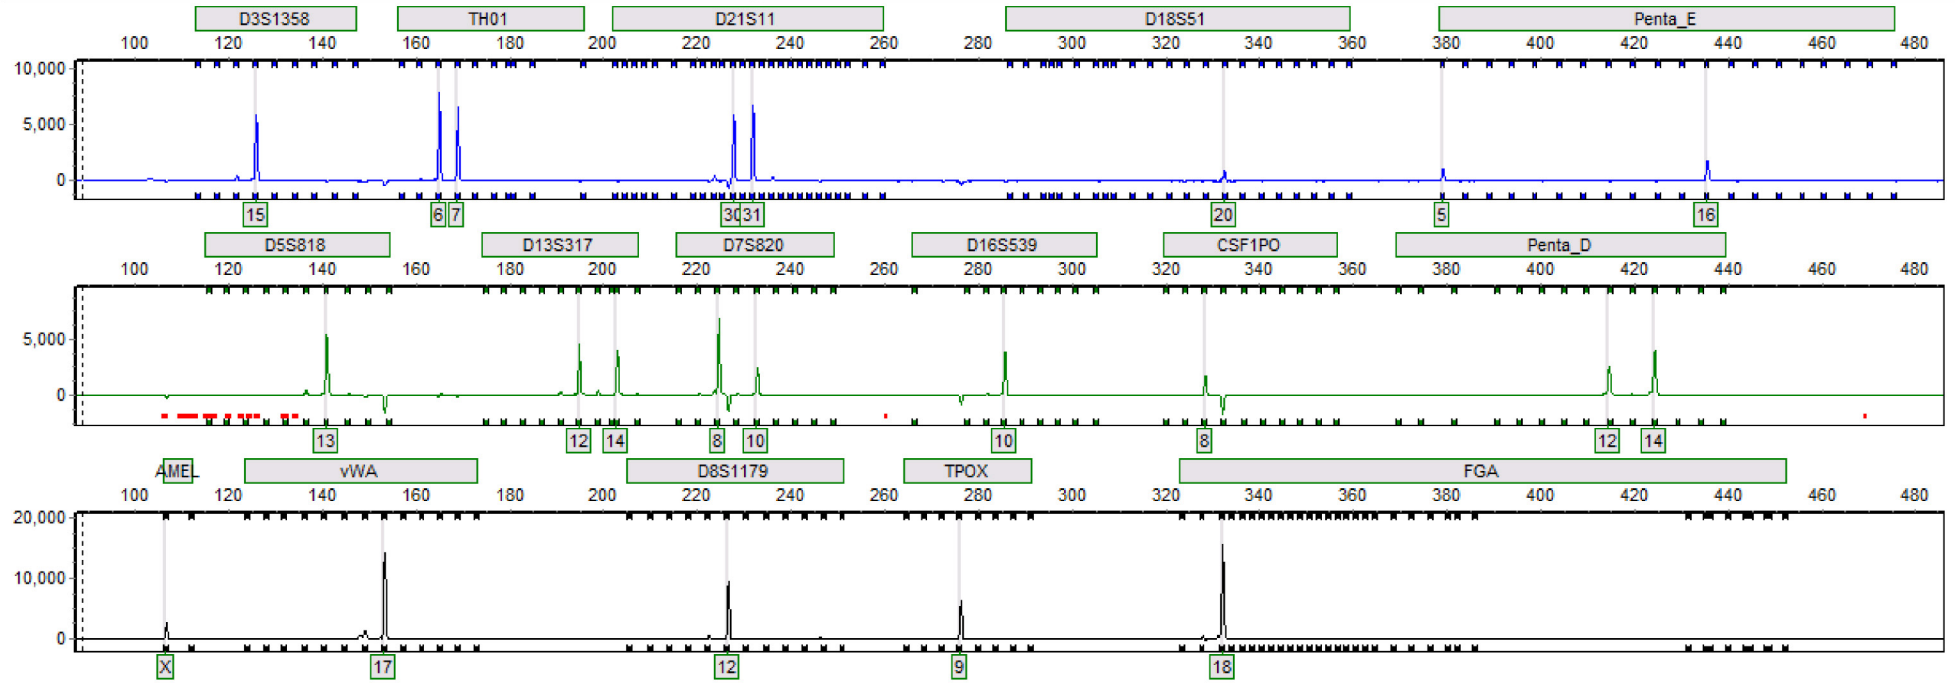

Table 1. STR profiles of Hep3B cell line

|         | Allele1 | Allele2 |
|---------|---------|---------|
| D3S1358 | 15      |         |
| TH01    | 6       | 7       |
| D21S11  | 30      | 31      |
| D18S51  | 20      |         |
| Penta_E | 5       | 16      |
| D5S818  | 13      |         |
| D13S317 | 12      | 14      |
| D7S820  | 8       | 10      |
| D16S539 | 10      |         |
| CSF1PO  | 8       |         |
| Penta_D | 12      | 14      |
| AMEL    | x       |         |
| vWA     | 17      |         |
| D8S1179 | 12      |         |
| TPOX    | 9       |         |
| FGA     | 18      |         |

Figure 2. Search result in ATCC database

## SEARCH THE STR DATABASE

As part of our continuing efforts to characterize and authenticate the cell lines in the Cell Biology collection, ATCC has developed a comprehensive database of short tandem repeat (STR) DNA profiles for all of our human cell lines. [View our brief tutorial before starting.](#)

1. [STR Profiling Analysis](#)
2. [Matching Algorithm](#)
3. [Interrogating the Database](#)

Showing 1 - 1 Of 1

PageSize: 100

| Add to Cart              | %Match | ATCC® Number | Designation | D5S818 | D13S317 | D7S820 | D16S539 | vWA | TH01 | AMEL | TPOX | CSF1PO |
|--------------------------|--------|--------------|-------------|--------|---------|--------|---------|-----|------|------|------|--------|
| <input type="checkbox"/> | 100    | HB-8064      | Hep 3B      | 13     | 12,14   | 8,10   | 10      | 17  | 6,7  | X    | 9    | 8      |

**Disclaimer:** Reference to this database and the data contained therein may be cited in publications, and ATCC encourages such citation or reference. While every reasonable effort has been made to assure the accuracy of these data, no warranty, express or implied, is made by ATCC as to their accuracy.

While ATCC has largely used the Promega PowerPlex® 1.2 System in the creation of these data and recommends that researchers wishing to produce data for comparison also use a Promega PowerPlex® System ATCC does not provide a general endorsement of this product or provide any warranty or representation regarding its quality or performance in the scientific community for the identification of human cell lines.

Figure 3. Search result in DSMZ database

**Result of STR matching analysis by your data.** - DSMZ Profile Database -

A graphical presentation is shown at the bottom of this page.

| EV          | Cell No. | Cell name                           | Locus names |         |        |         |       |      |     |       |        | Figures |
|-------------|----------|-------------------------------------|-------------|---------|--------|---------|-------|------|-----|-------|--------|---------|
|             |          |                                     | D5S818      | D13S317 | D7S820 | D16S539 | VWA   | TH01 | AM  | TPOX  | CSF1PO |         |
|             |          | <i>Query (Your Cell)</i>            | 13          | 12,14   | 8,10   | 10      | 17    | 6,7  | x   | 9     | 8      |         |
| 1.20(36/30) | 93       | HEP-3B                              | 13,13       | 12,14   | 8,10   | 10,10   | 17,17 | 6,7  | X,X | 9,9   | 8,8    | -       |
| 1.20(36/30) | HB-8064  | Hep 3B2.1-7 [Hep 3B, Hep-3B, Hep3B] | 13,13       | 12,14   | 8,10   | 10,10   | 17,17 | 6,7  | X,X | 9,9   | 8,8    | -       |
| 0.80(24/30) | CRL-5966 | NCI-BL2107                          | 13,13       | 12,13   | 8,8    | 10,13   | 17,17 | 6,7  | X,Y | 10,11 | 8,11   | -       |
| 0.73(22/30) | 490      | MUTZ-5                              | 11,11       | 10,12   | 10,10  | 10,10   | 16,17 | 7,7  | X,X | 8,11  | 8,9    | -       |
| 0.73(22/30) | CCL-205  | CCD 18Lu                            | 12,12       | 12,12   | 8,8    | 12,13   | 15,17 | 6,7  | X,X | 8,11  | 8,8    | -       |
| 0.73(22/30) | CRL-1459 | CCD-18Co                            | 12,12       | 12,12   | 8,8    | 12,13   | 15,17 | 6,7  | X,X | 8,11  | 8,8    | -       |
| 0.73(22/30) | CRL-2320 | HCC1008                             | 13,13       | 12,12   | 10,10  | 14,15   | 17,19 | 7,7  | X,X | 11,11 | 12,13  | -       |

Figure 4. Authentication of the species of the sample

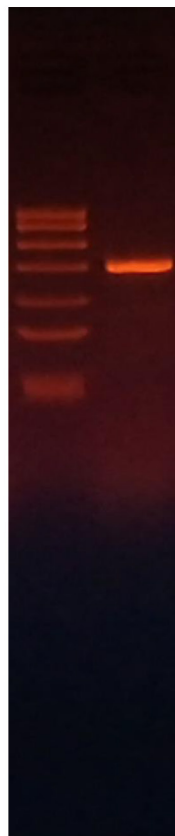

M: Marker. As the size of 700, 600, 500, 400, 300, 200 and 100bp from up to down.

Nine species are checked, as follow: *Homo sapiens* 391bp, *Cricetulus griseus* 315bp, *Macaca mulatta* 287bp, *Cercopithecus aethiops* 222bp, *Rattus norvegicus* 196bp, *Canis familiaris* 172bp, *Mus musculus* 150bp, *Bos Taurus* 102bp, IC 70bp

The sample: The band size is 391bp which matches the size of human.

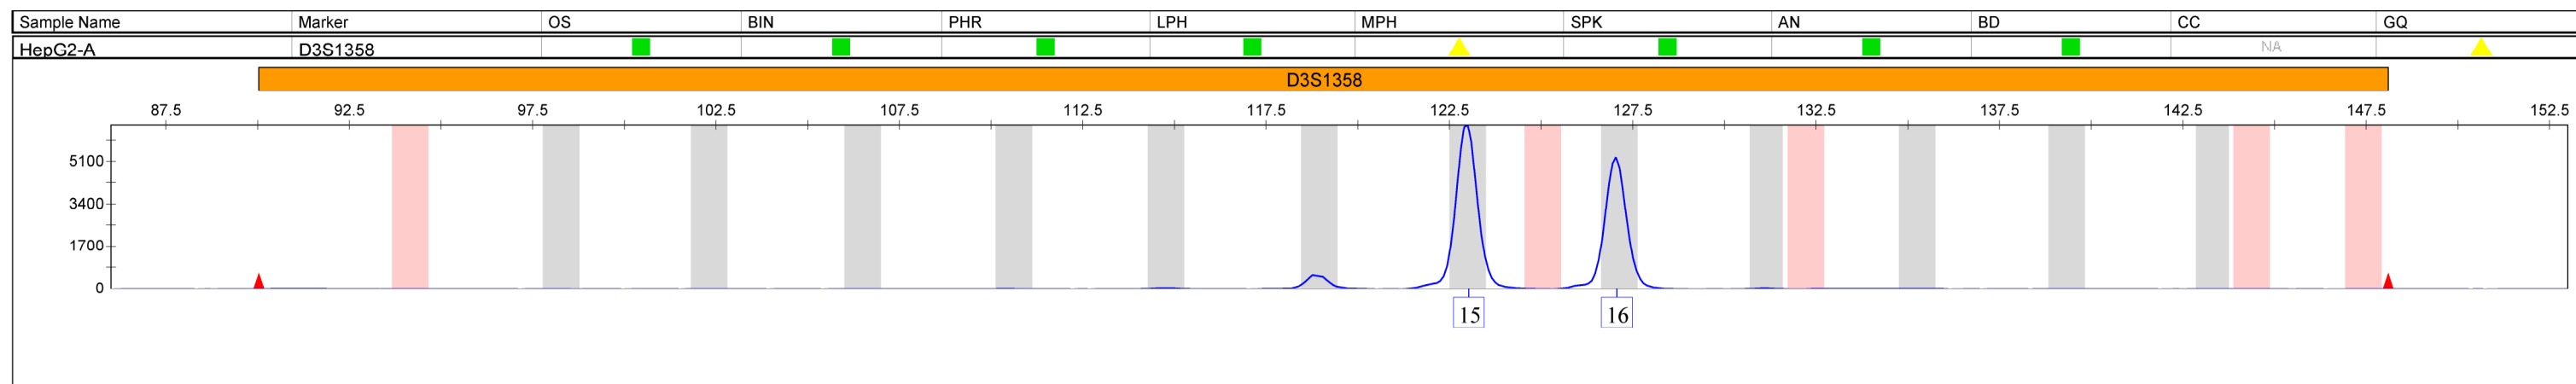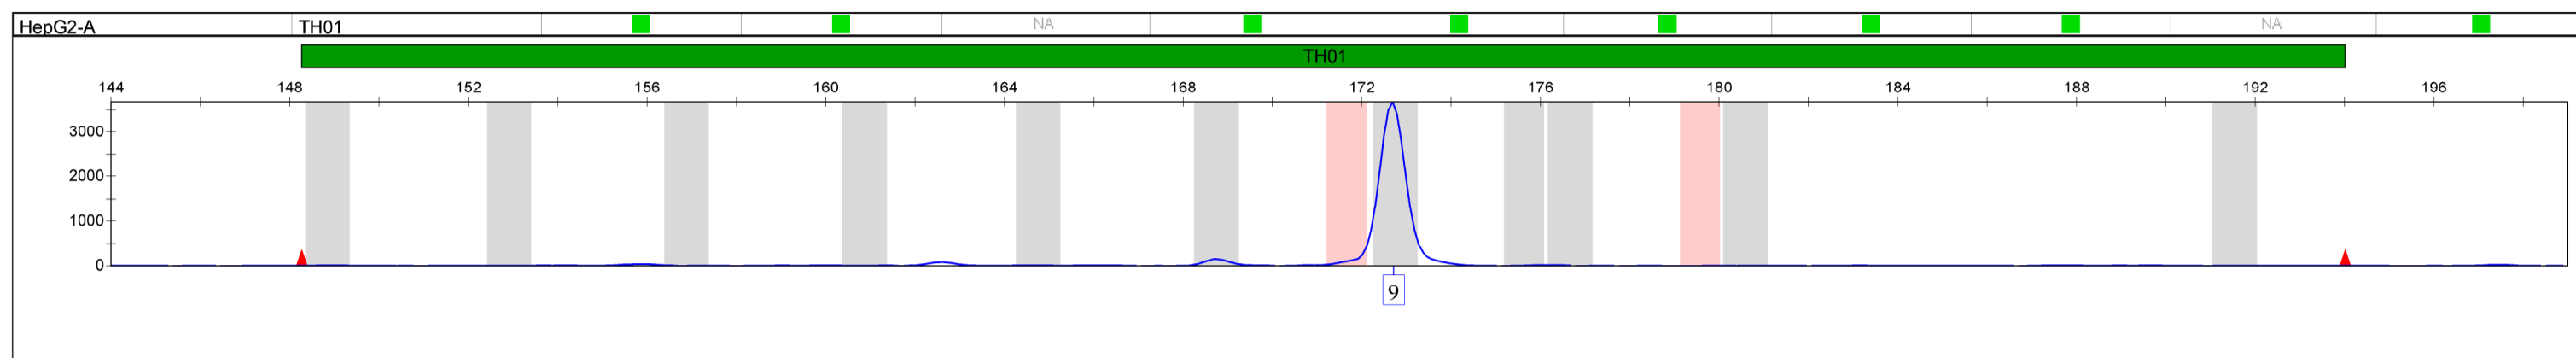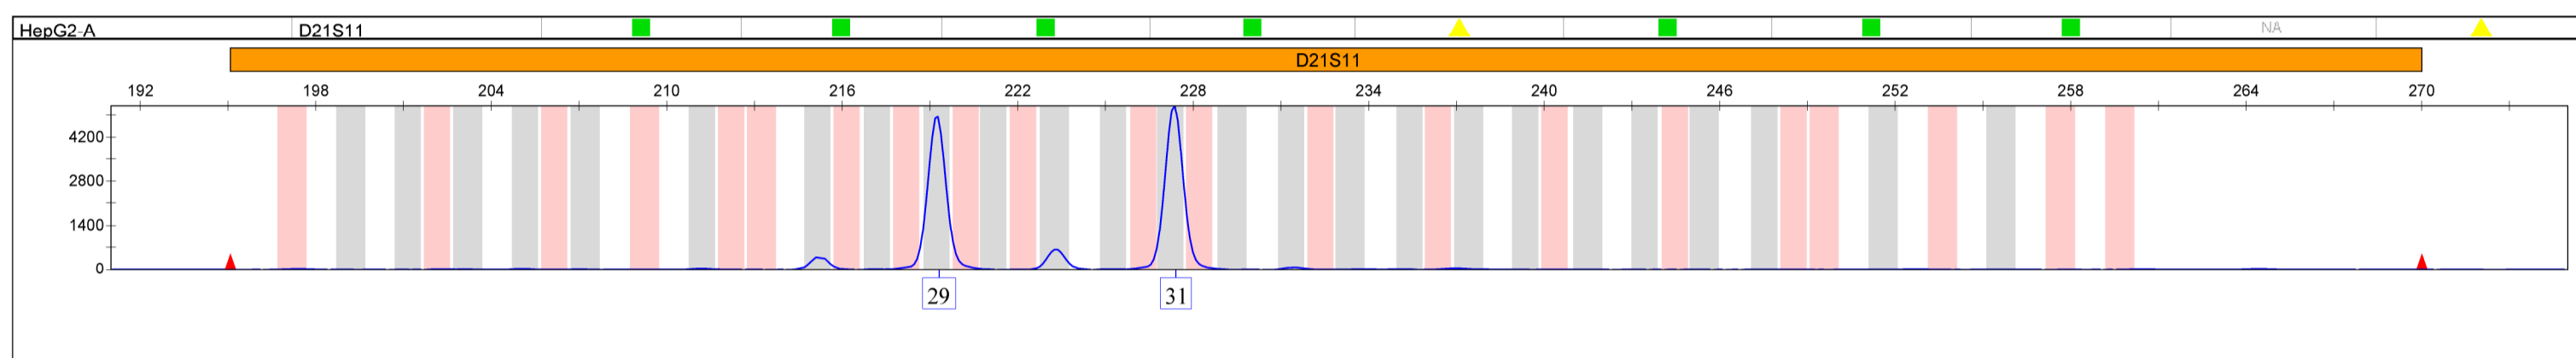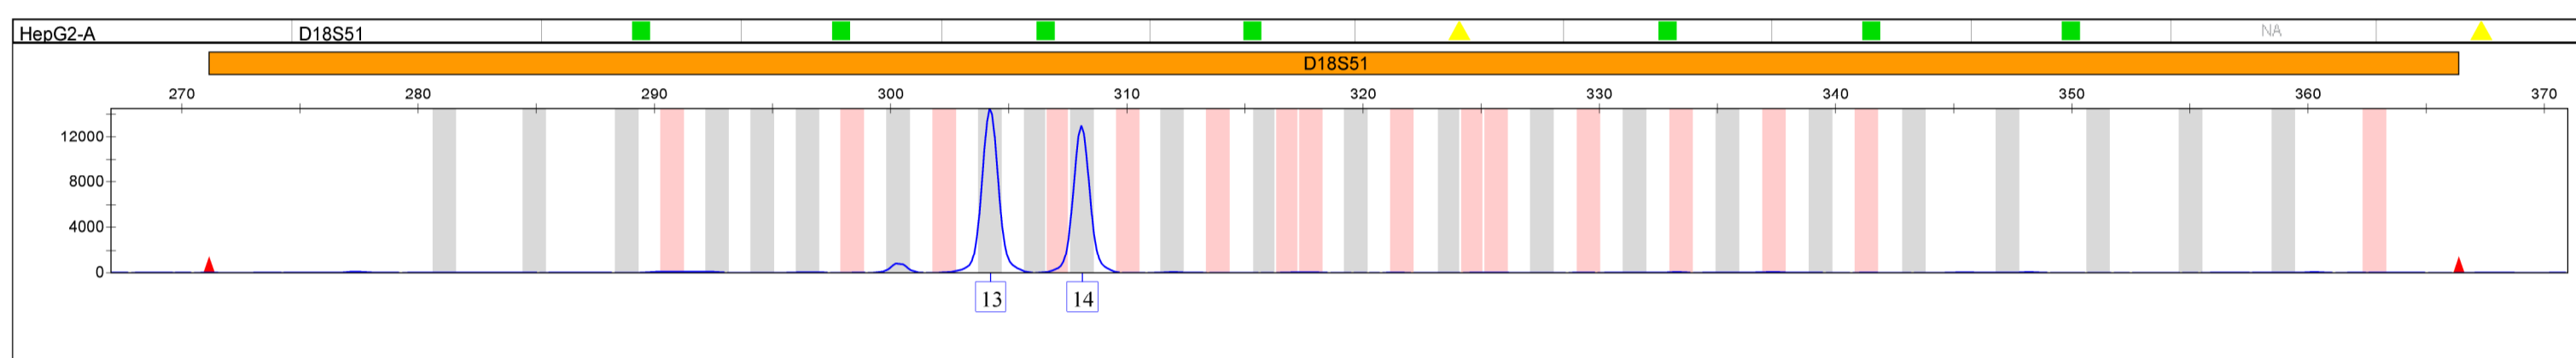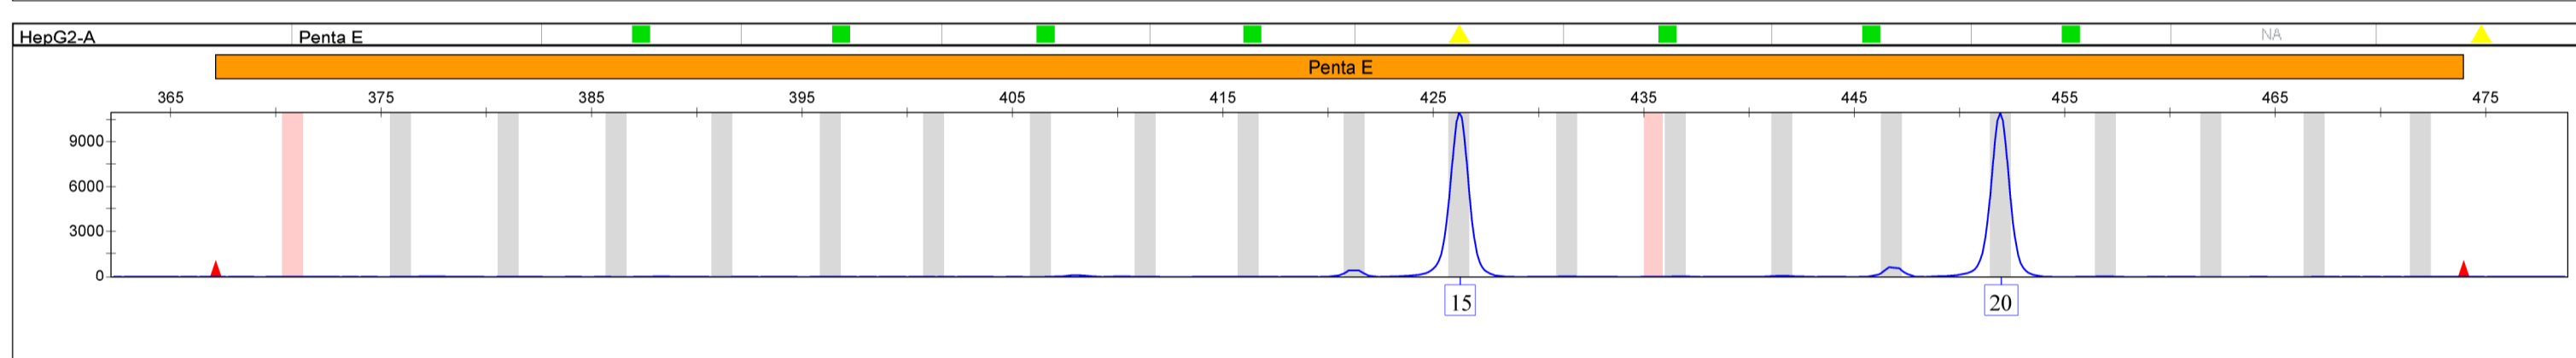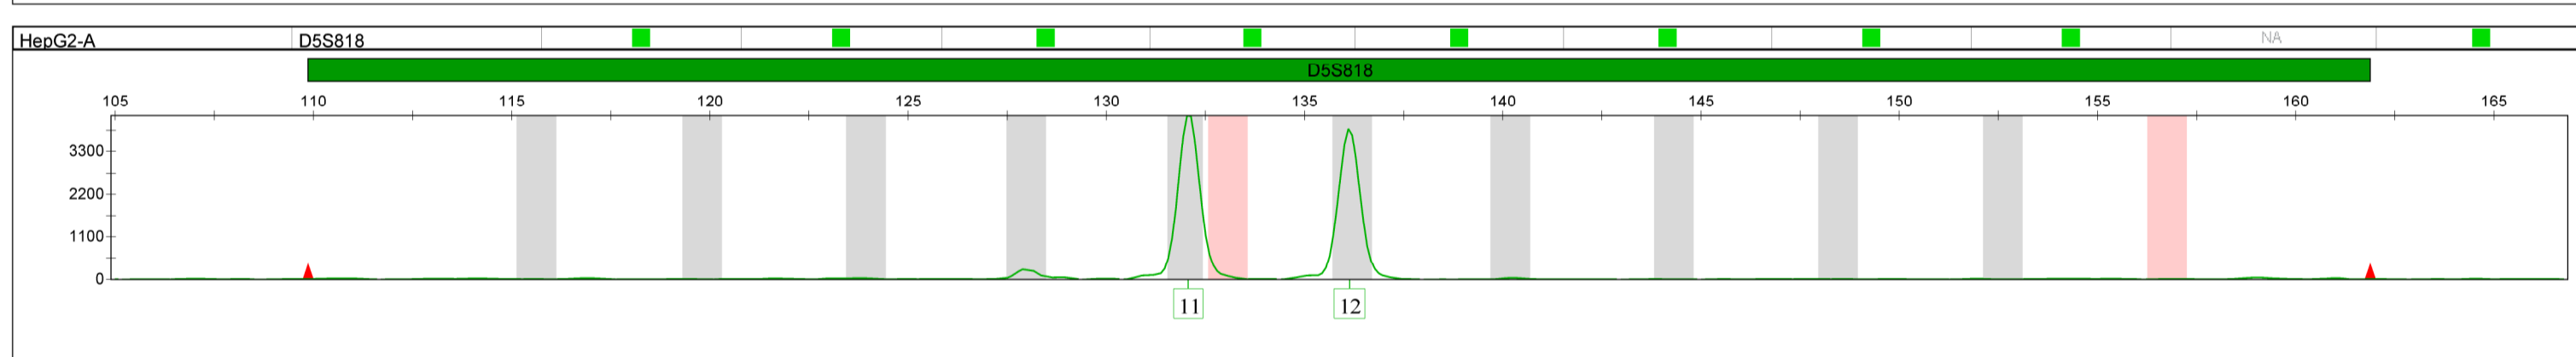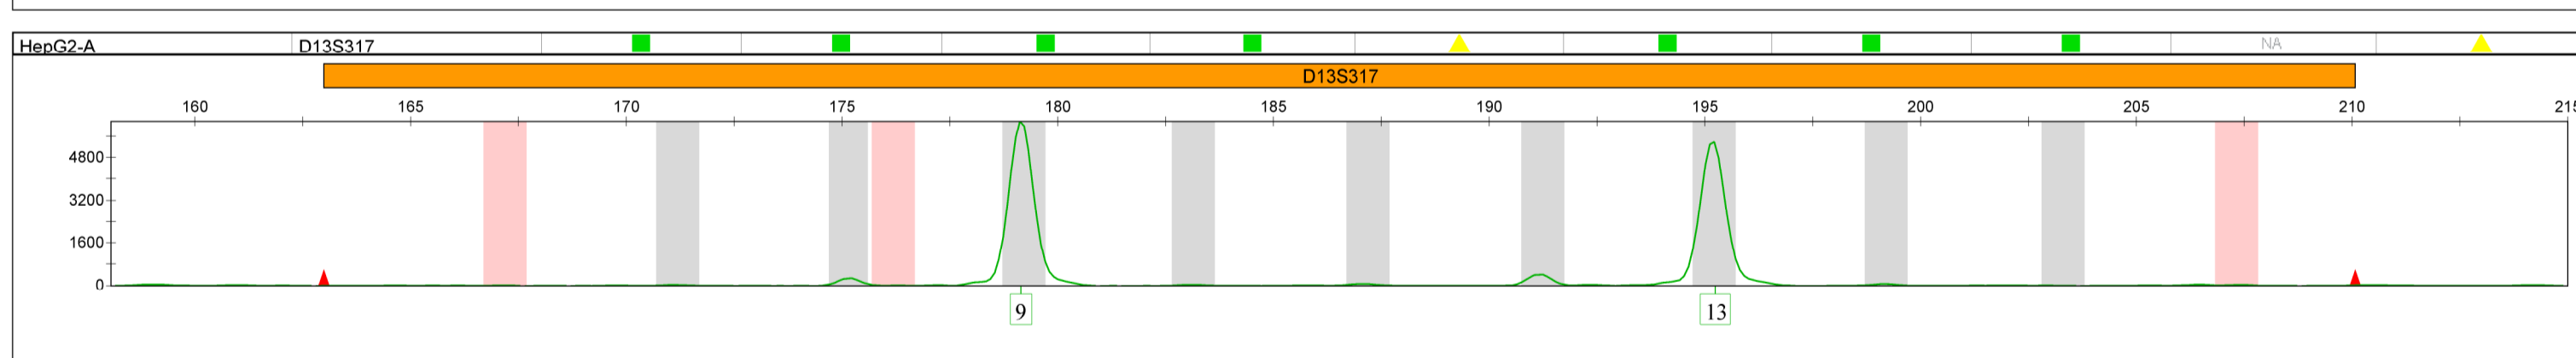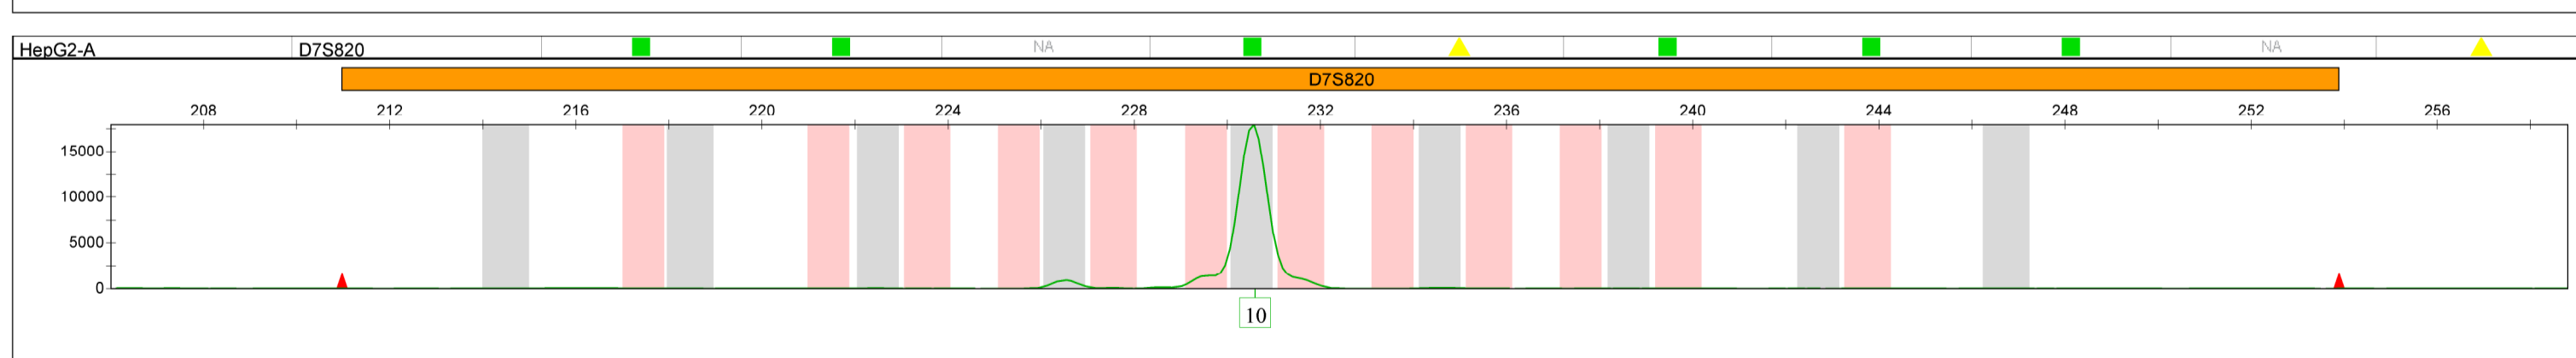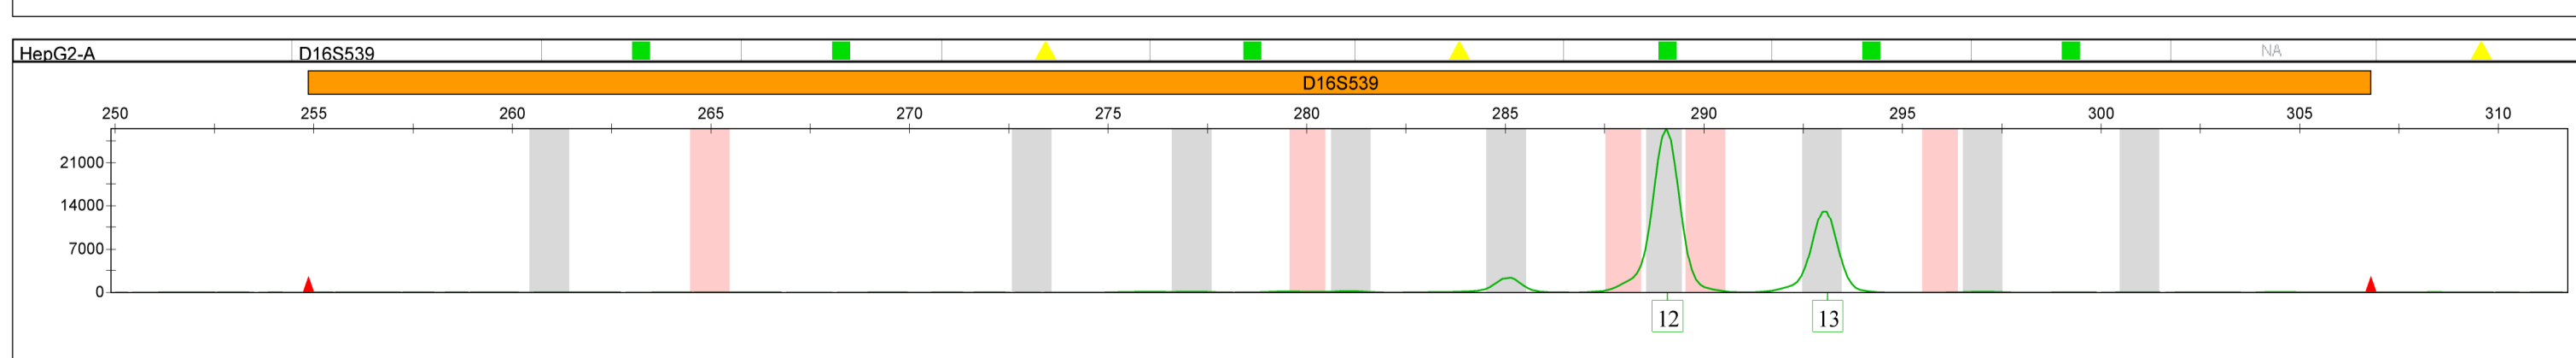

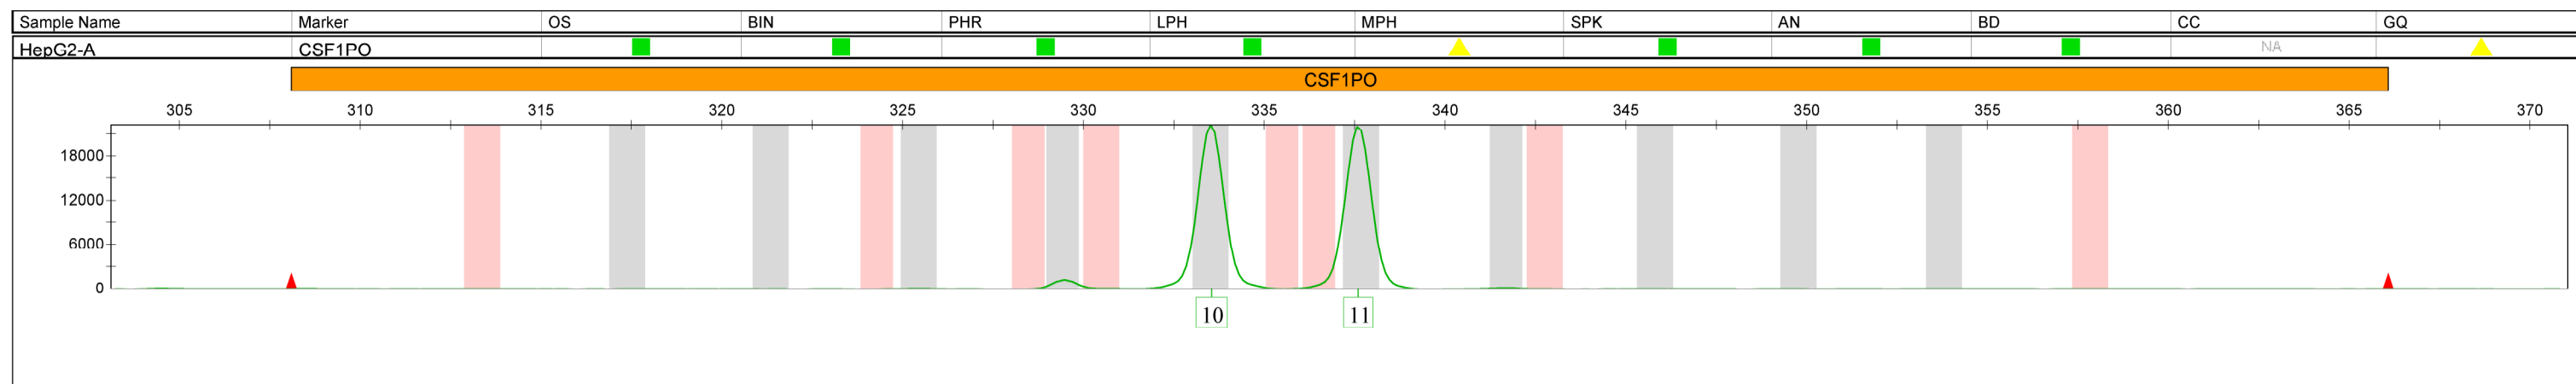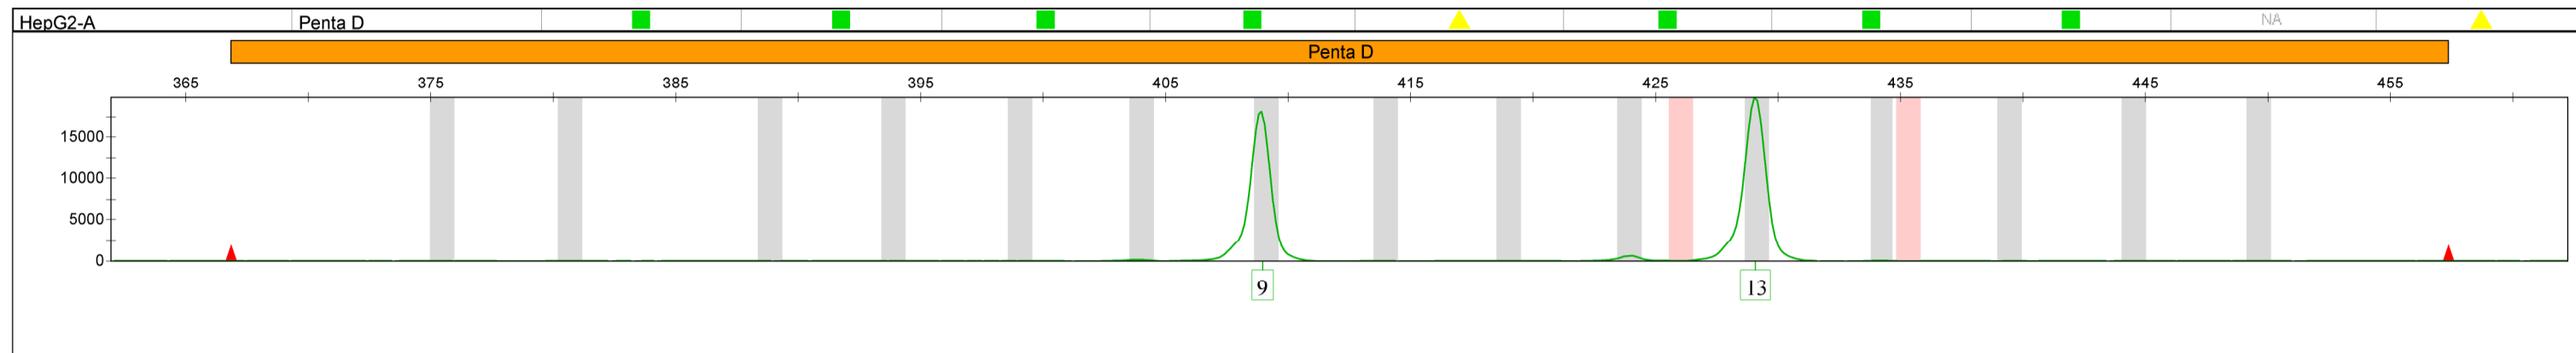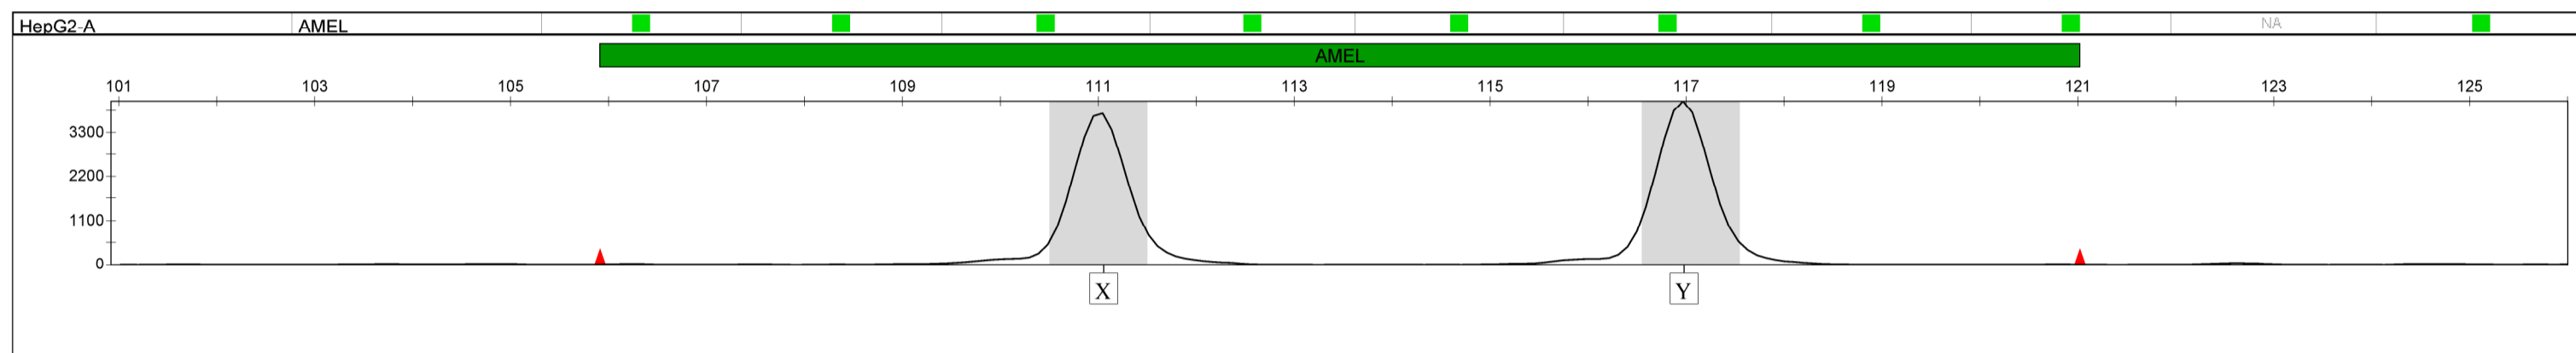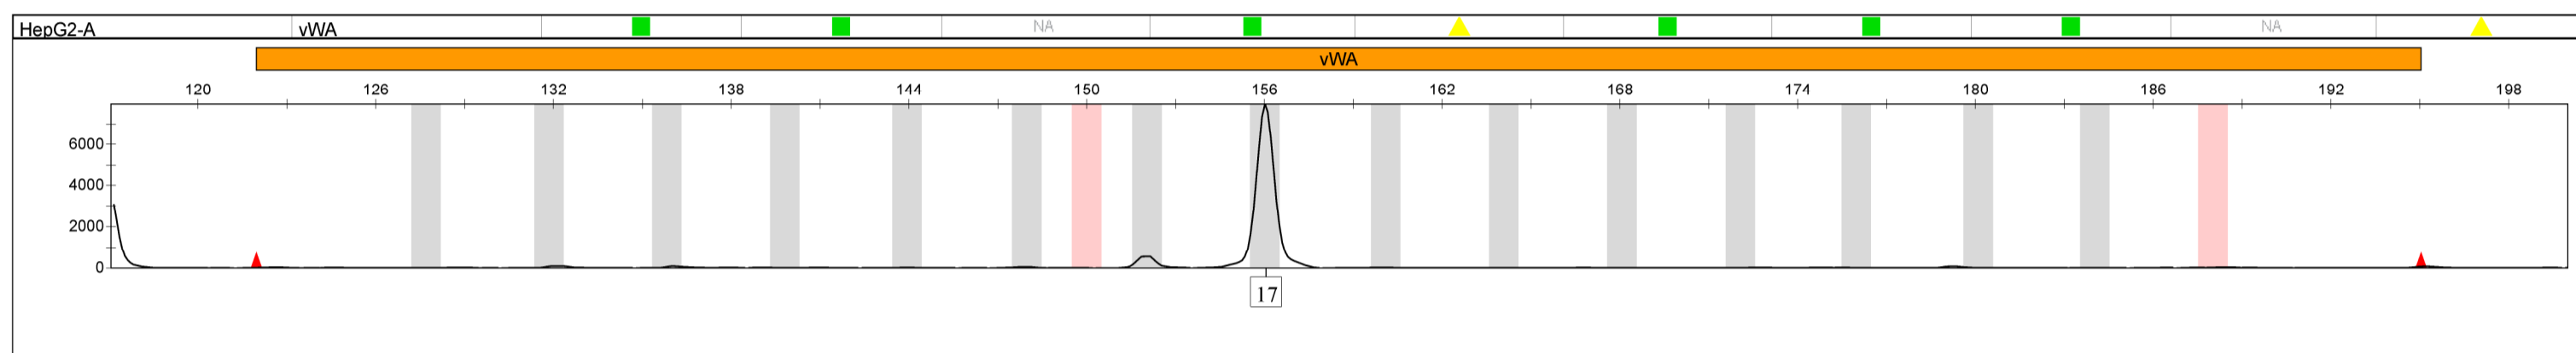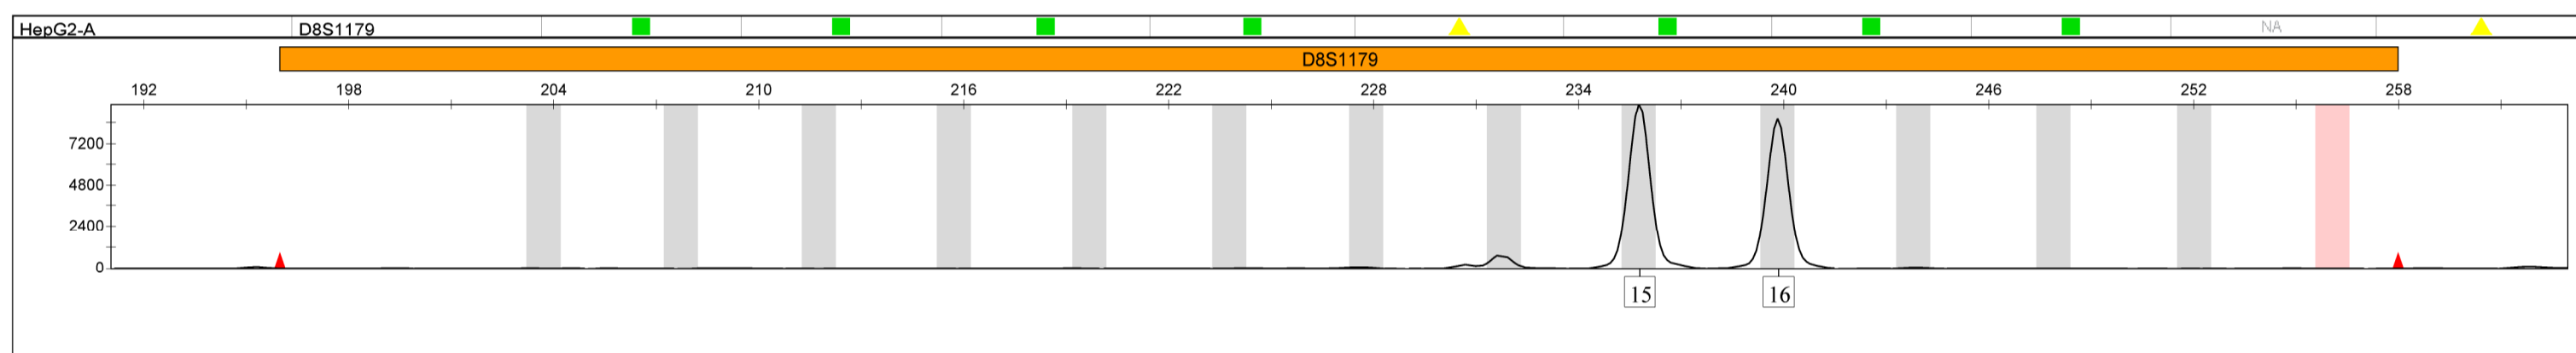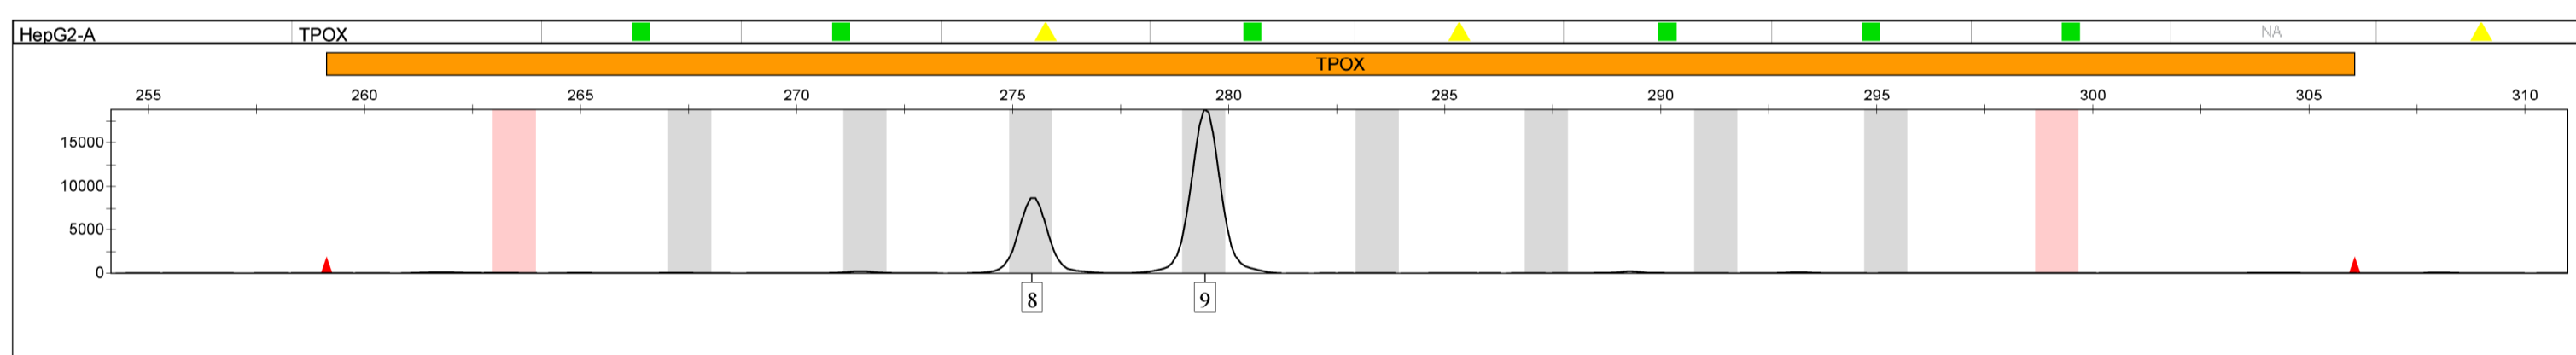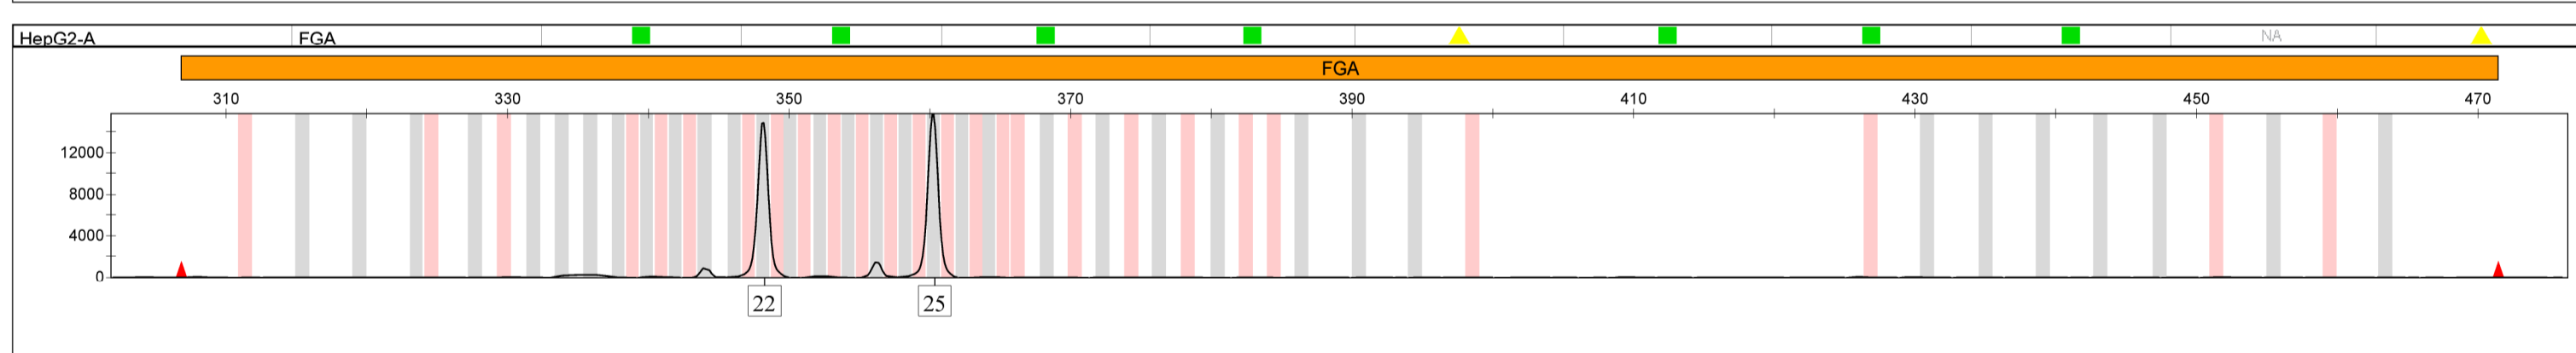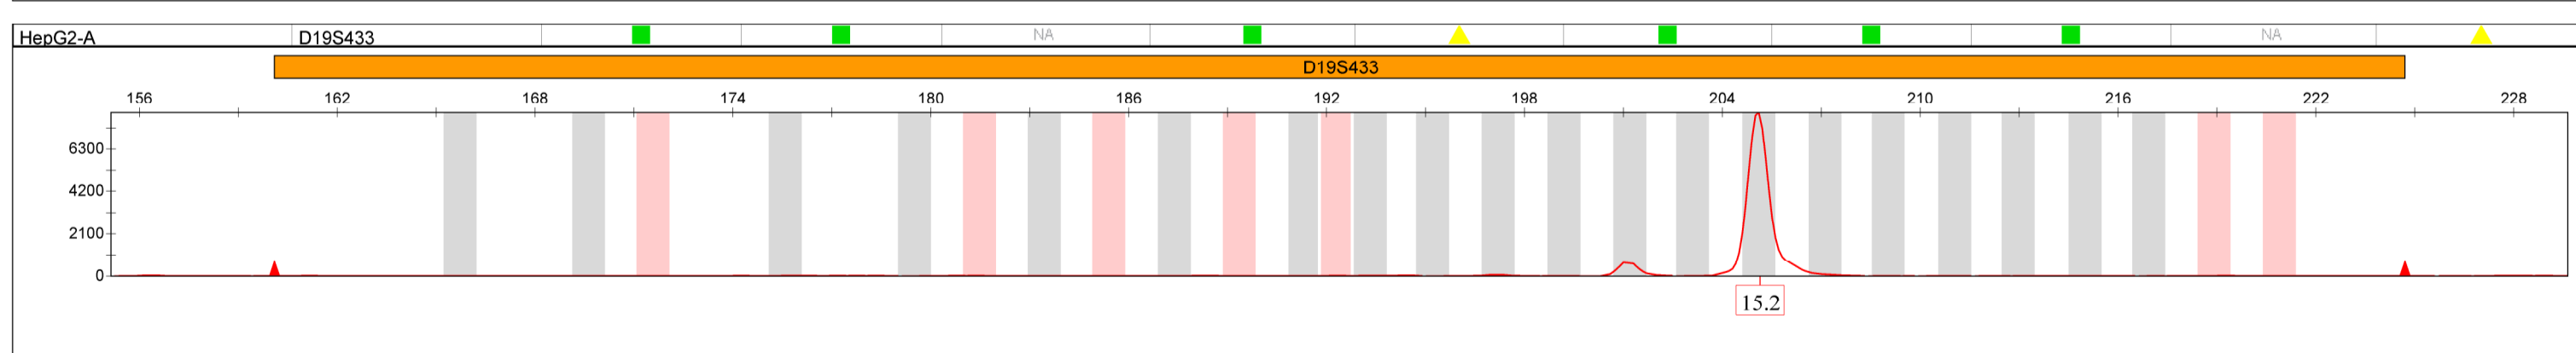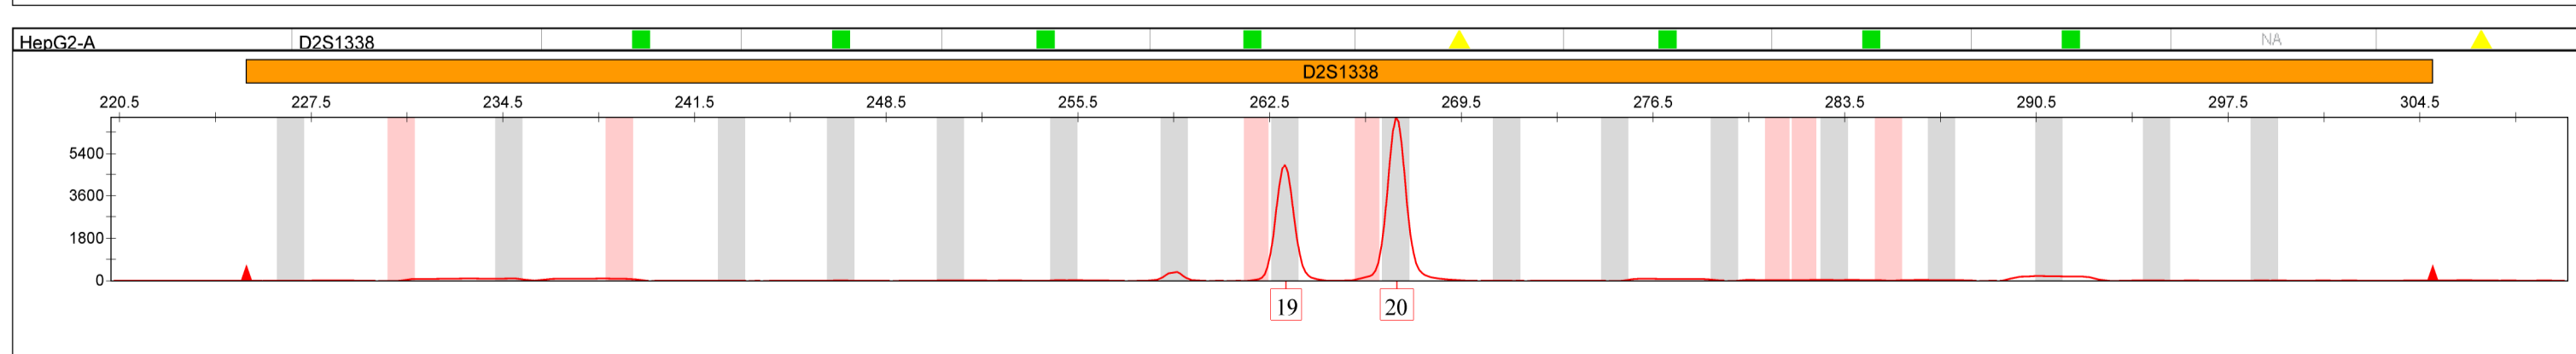

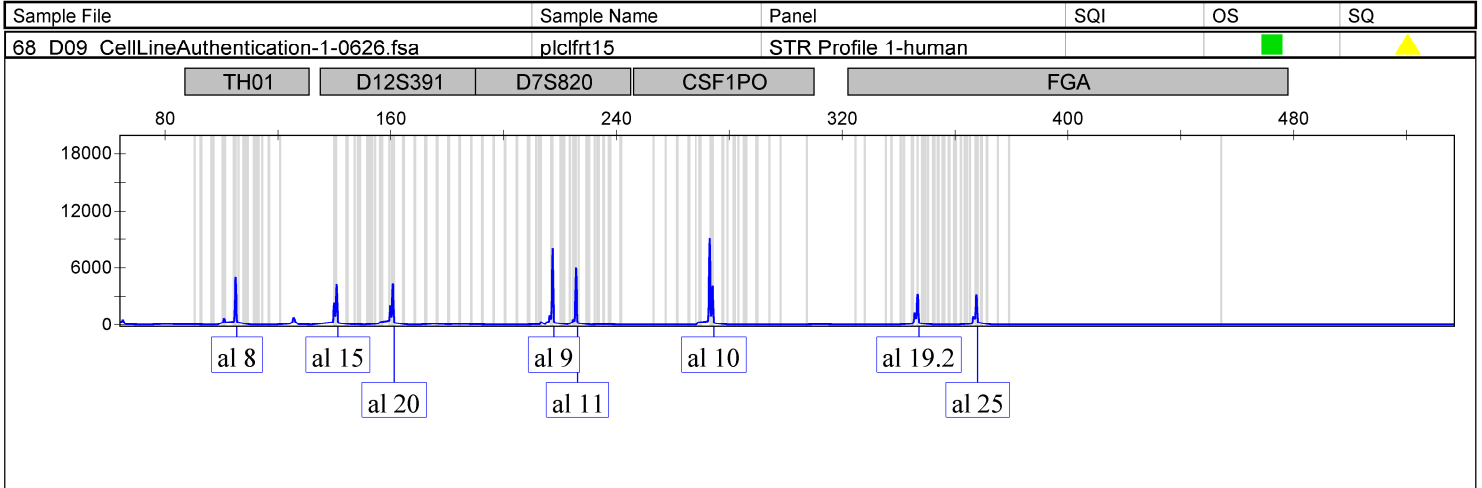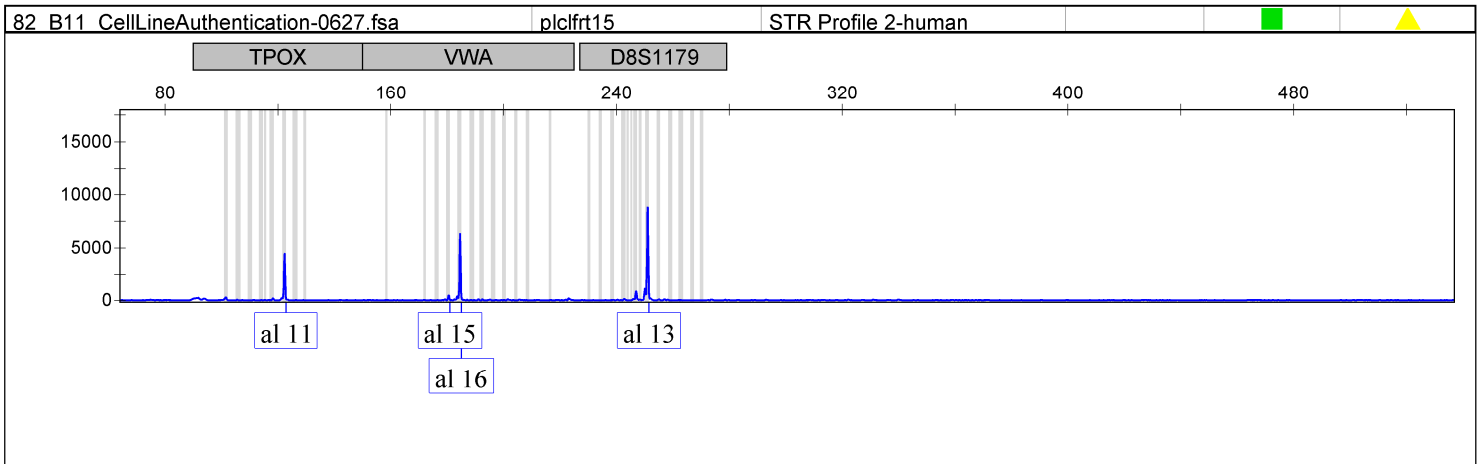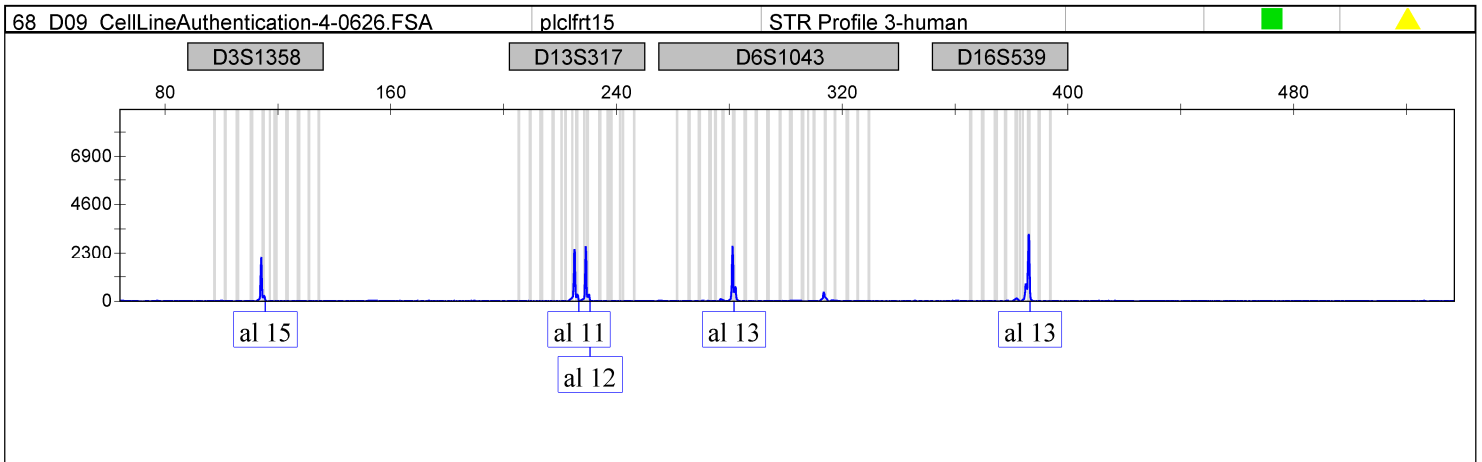

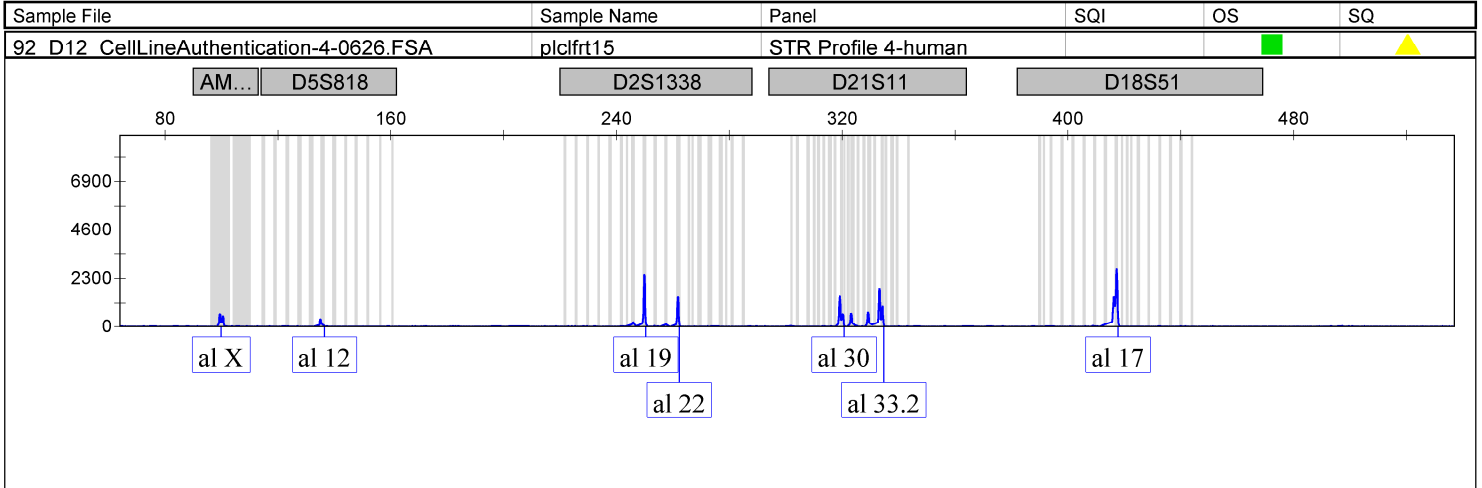



| Sample File                              | Sample Name | Panel               | SQI | OS | SQ |
|------------------------------------------|-------------|---------------------|-----|----|----|
| 68_D09_CellLineAuthentication-1-0626.fsa | plclfrt15   | STR Profile 1-human |     | ■  | ▲  |

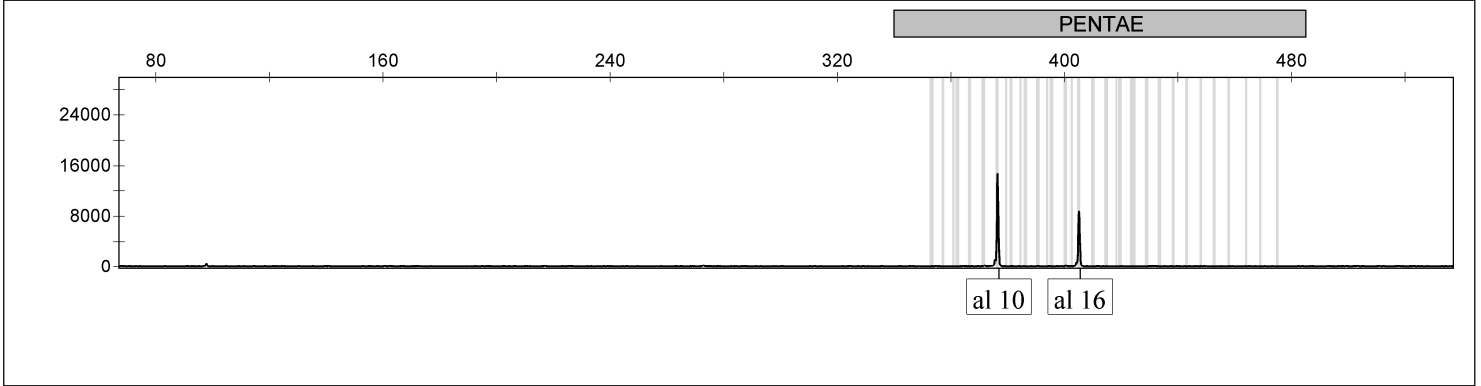

| Sample File                              | Sample Name | Panel               | SQI | OS | SQ |
|------------------------------------------|-------------|---------------------|-----|----|----|
| 68_D09_CellLineAuthentication-3-0626.fsa | plclfrt15   | STR Profile 2-human |     | ■  | ▲  |

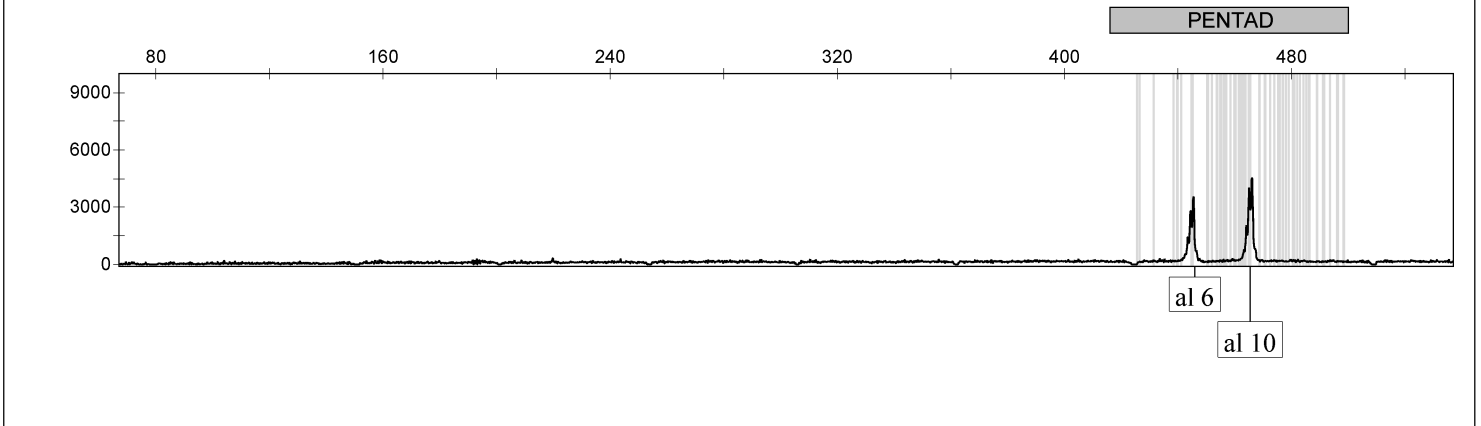

| Sample File                              | Sample Name | Panel               | SQI | OS | SQ |
|------------------------------------------|-------------|---------------------|-----|----|----|
| 68_D09_CellLineAuthentication-4-0626.FSA | plclfrt15   | STR Profile 3-human |     | ■  | ▲  |

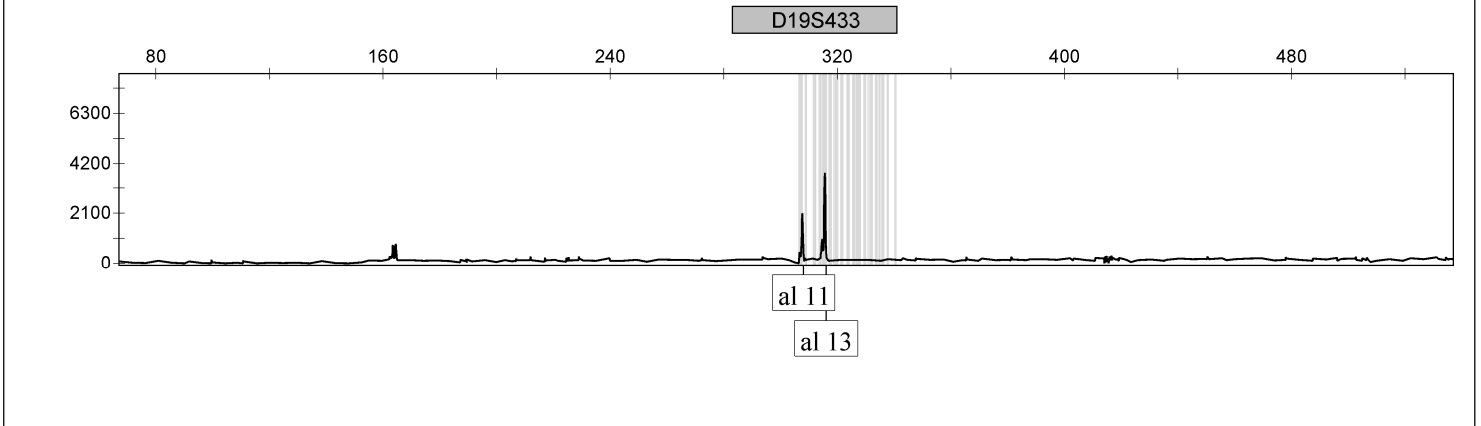

| Sample File                              | Sample Name | Panel               | SQI | OS | SQ |
|------------------------------------------|-------------|---------------------|-----|----|----|
| 92_D12_CellLineAuthentication-4-0626.FSA | plclfrt15   | STR Profile 4-human |     | ■  | ▲  |

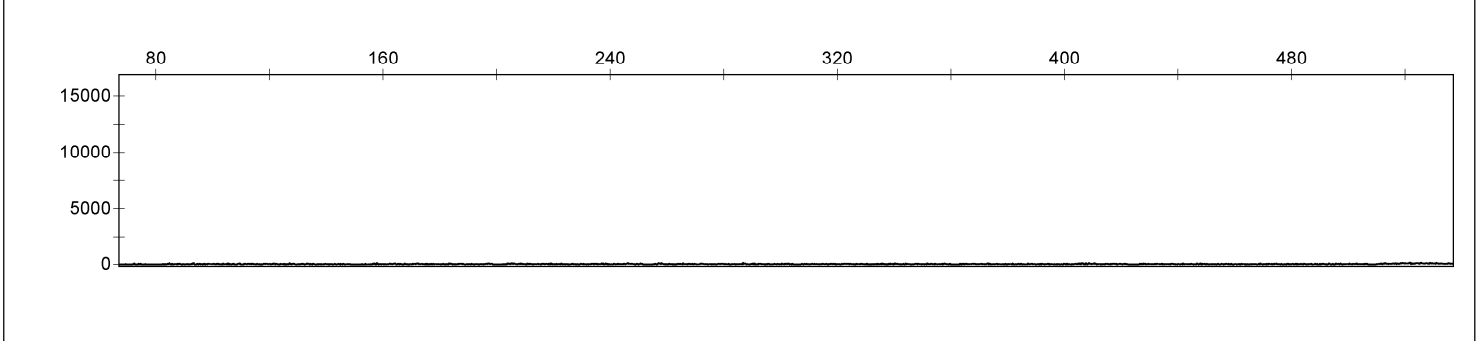

# Report of Human Cell Line Authentication

(Notice: This authentication report is restricted to the cell sold from Guangzhou Cellcook Biotech Co., Ltd, and the date with seal is the date of delivery. )

## I . Sample

Sample Name: labeled as ‘SK-HEP-1’

## II . Method and Procedure

1. PCR is amplified with STR Multi-amplification Kit (PowerPlex™16HS System);
2. PCR products are assayed with 3100 DNA Analyzer (Applied Biosystems®).
3. Amplification of gene COX1 and electrophoresis are employed to survey the species of the sample.

## III. Results

1. The STR profiles of the cell line sample are in the attached table and figure.
2. The search result in ATCC and DSMZ databases.
3. The electrophoresis figure of gene COX1.

SK-HEP-1: ①No loci has tri-alleles or tetra-alleles. Contamination of other human cell line is not found (Figure 1 & Table 1). ②100% matched cell lines are found in ATCC and DSMZ data banks. And the cell line named as “SK-HEP-1.” *et al.* (Figure 2 & Figure 3).③The sample is a human cell line. Contamination of other species cells are not found in the sample (Figure 4).

Operator: Xiaohua Mo

Auditor: Xuanyi Liang

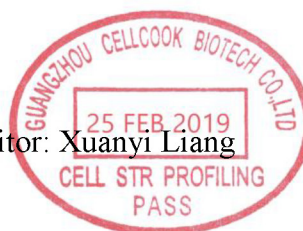

Guangzhou Cellcook Biotech Co., Ltd

Figure 1. STR profiles of SK-HEP-1 cell line

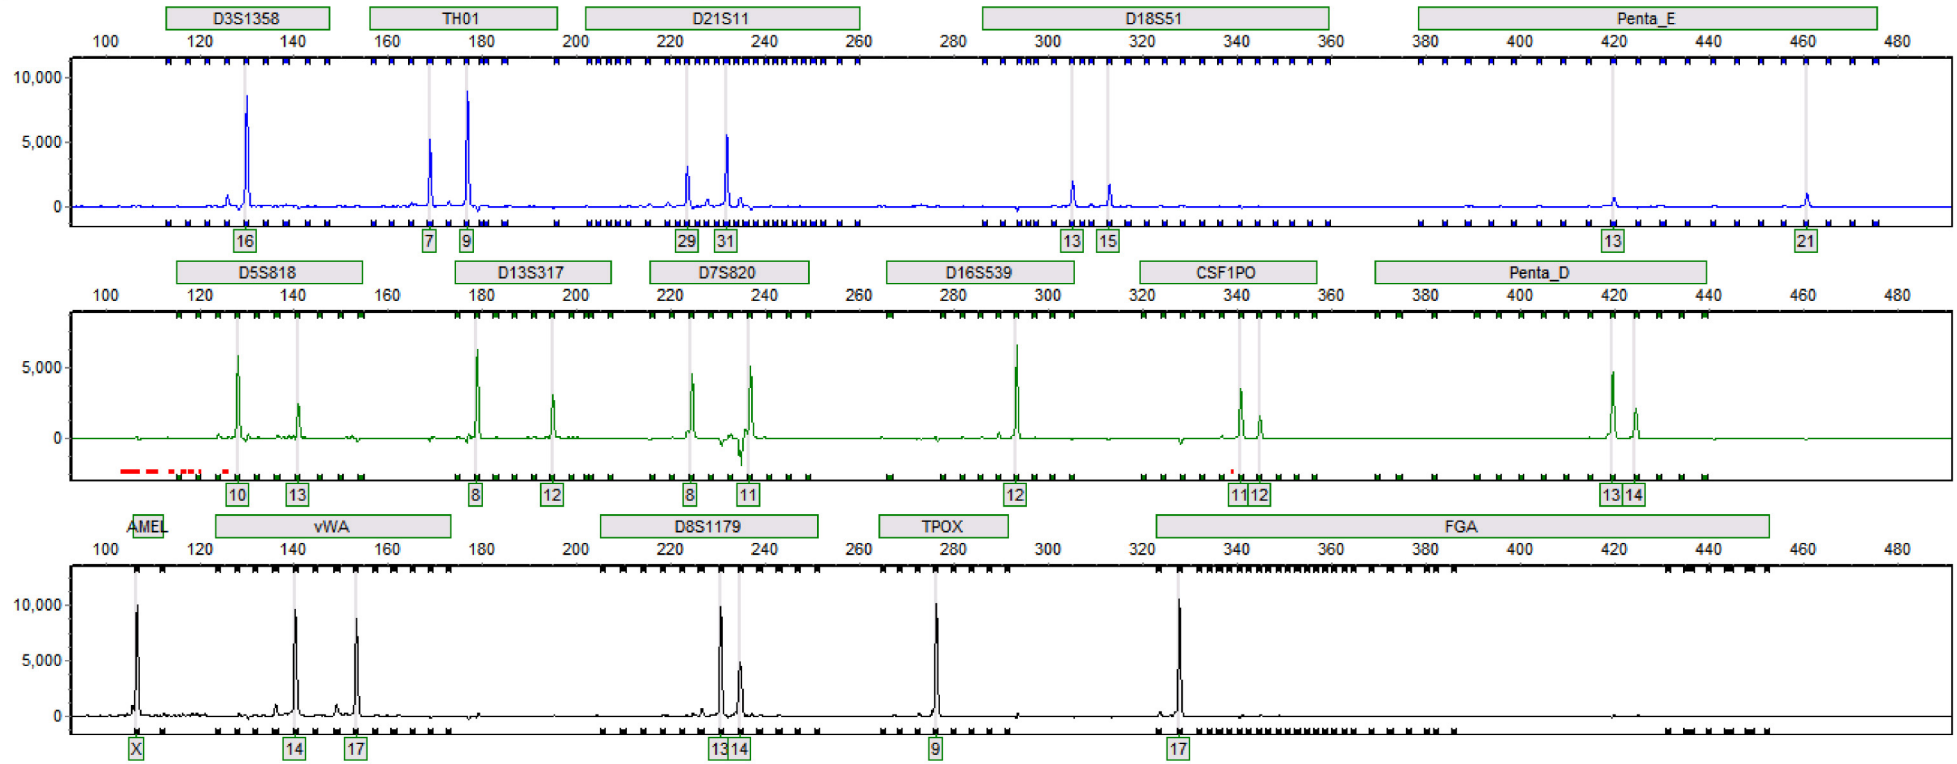

Table 1. STR profiles of SK-HEP-1 cell line

|         | Allele1 | Allele2 |
|---------|---------|---------|
| D3S1358 | 16      |         |
| TH01    | 7       | 9       |
| D21S11  | 29      | 31      |
| D18S51  | 13      | 15      |
| Penta_E | 13      | 21      |
| D5S818  | 10      | 13      |
| D13S317 | 8       | 12      |
| D7S820  | 8       | 11      |
| D16S539 | 12      |         |
| CSF1PO  | 11      | 12      |
| Penta_D | 13      | 14      |
| AMEL    | x       |         |
| vWA     | 14      | 17      |
| D8S1179 | 13      | 14      |
| TPOX    | 9       |         |
| FGA     | 17      |         |

Figure 2. Search result in ATCC database

## SEARCH THE STR DATABASE

As part of our continuing efforts to characterize and authenticate the cell lines in the Cell Biology collection, ATCC has developed a comprehensive database of short tandem repeat (STR) DNA profiles for all of our human cell lines. [View our brief tutorial before starting.](#)

1. [STR Profiling Analysis](#)
2. [Matching Algorithm](#)
3. [Interrogating the Database](#)

Showing 1 - 1 Of 1

PageSize: 100

| Add to Cart              | %Match | ATCC® Number | Designation                          | D5S818 | D13S317 | D7S820 | D16S539 | vWA   | TH01 | AMEL | TPOX | CSF1PO |
|--------------------------|--------|--------------|--------------------------------------|--------|---------|--------|---------|-------|------|------|------|--------|
| <input type="checkbox"/> | 100.0  | HTB-52       | SK-HEP-1Liver<br>AdenocarcinomaHuman | 10,13  | 8,12    | 8,11   | 12      | 14,17 | 7,9  | X    | 9    | 11,12  |

Add to Cart

Export to Excel

**Disclaimer:** Reference to this database and the data contained therein may be cited in publications, and ATCC encourages such citation or reference. While every reasonable effort has been made to assure the accuracy of these data, no warranty, express or implied, is made by ATCC as to their accuracy.

While ATCC has largely used the Promega PowerPlex® 1.2 System in the creation of these data and recommends that researchers wishing to produce data for comparison also use a Promega PowerPlex® System ATCC does not

Figure 3. Search result in DSMZ database

| Result of STR matching analysis by your data.                 |          |           |             |         |        |         |       |      |     |      |        |         |
|---------------------------------------------------------------|----------|-----------|-------------|---------|--------|---------|-------|------|-----|------|--------|---------|
| - DSMZ Profile Database -                                     |          |           |             |         |        |         |       |      |     |      |        |         |
| A graphical presentation is shown at the bottom of this page. |          |           |             |         |        |         |       |      |     |      |        |         |
| EV                                                            | Cell No. | Cell name | Locus names |         |        |         |       |      |     |      |        | Figures |
|                                                               |          |           | D5S818      | D13S317 | D7S820 | D16S539 | VWA   | TH01 | AM  | TPOX | CSF1PO |         |
| Query (Your Cell)                                             |          |           | 10,13       | 8,12    | 8,11   | 12      | 14,17 | 7,9  | X   | 9    | 11,12  |         |
| 1.09(36/33)                                                   | 141      | SK-HEP-1  | 10,13       | 8,12    | 8,11   | 12,12   | 14,17 | 7,9  | X,X | 9,9  | 11,12  | -       |
| 1.09(36/33)                                                   | HTB-52   | SK-HEP-1  | 10,13       | 8,12    | 8,11   | 12,12   | 14,17 | 7,9  | X,X | 9,9  | 11,12  | -       |
| 0.91(30/33)                                                   | JCRB1131 | UE6E7T-1  | 10,13       | 8,8     | 8,11   | 11,12   | 17,18 | 9,9  | X,X | 9,11 | 11,12  | -       |
| 0.91(30/33)                                                   | JCRB1133 | UE6E7T-2  | 10,13       | 8,8     | 8,11   | 11,12   | 17,18 | 9,9  | X,X | 9,11 | 11,12  | -       |
| 0.91(30/33)                                                   | JCRB1136 | UE6E7T-3  | 10,13       | 8,8     | 8,11   | 11,12   | 17,18 | 9,9  | X,X | 9,11 | 11,12  | -       |
| 0.91(30/33)                                                   | JCRB1140 | UBE6T-6   | 10,13       | 8,8     | 8,11   | 11,12   | 17,18 | 9,9  | X,X | 9,11 | 11,12  | -       |
| 0.91(30/33)                                                   | JCRB1147 | UE7T-9    | 10,13       | 8,8     | 8,11   | 11,12   | 17,18 | 9,9  | X,X | 9,11 | 11,12  | -       |
| 0.91(30/33)                                                   | JCRB1149 | UE6E7T-11 | 10,13       | 8,8     | 8,11   | 11,12   | 17,18 | 9,9  | X,X | 9,11 | 11,12  | -       |
| 0.91(30/33)                                                   | JCRB1151 | UE6E7T-12 | 10,13       | 8,8     | 8,11   | 11,12   | 17,18 | 9,9  | X,X | 9,11 | 11,12  | -       |
| 0.91(30/33)                                                   | JCRB1154 | UE7T-13   | 10,13       | 8,8     | 8,11   | 11,12   | 17,18 | 9,9  | X,X | 9,11 | 11,12  | -       |
| 0.91(30/33)                                                   | JCRB1159 | UBE6T-15  | 10,13       | 8,8     | 8,11   | 11,12   | 17,18 | 9,9  | X,X | 9,11 | 11,12  | -       |

Figure 4. Authentication of the species of the sample

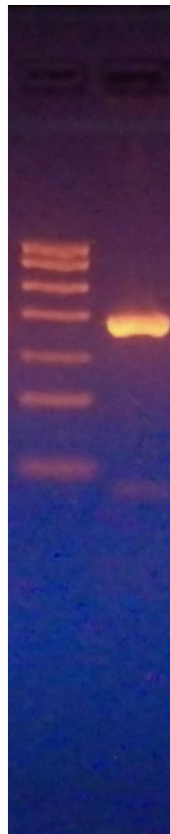

M: Marker. As the size of 700, 600, 500, 400, 300, 200 and 100bp from up to down.

Nine species are checked, as follow: *Homo sapiens* 391bp, *Cricetulus griseus* 315bp, *Macaca mulatta* 287bp, *Cercopithecus aethiops* 222bp, *Rattus norvegicus* 196bp, *Canis familiaris* 172bp, *Mus musculus* 150bp, *Bos Taurus* 102bp, IC 70bp

The sample: The band size is 391bp which matches the size of human.
